# Supplementary material for: Interacting Learning Processes during Skill Acquisition: Learning to control with gradually changing system dynamics
Source: PubMed Central journal article supplement (PMC5643438; doi:10.1038/s41598-017-13510-0), 2017-10-16
Supplement: 41598_2017_13510_MOESM2_ESM.pdf [file 41598_2017_13510_MOESM2_ESM.pdf]

# **Supplementary Material 2: Interacting Learning Processes during Skill Acquisition: Learning to control with gradually changing system dynamics**

**Nicolas Ludolph<sup>1, 2\*</sup>, Martin A. Giese<sup>1</sup>, Winfried Ilg<sup>1</sup>**

<sup>1</sup>Section Computational Sensomotrics, Department of Cognitive Neurology,  
Hertie Institute for Clinical Brain Research, and Centre for Integrative Neuroscience, University of Tübingen,  
Germany

<sup>2</sup>International Max-Planck Research School for Cognitive and Systems Neuroscience, University of Tübingen,  
Germany

Corresponding author: Nicolas Ludolph  
Department of Cognitive Neurology,  
Hertie Institute for Clinical Brain Research,  
Centre for Integrative Neuroscience  
Otfried-Müller-Straße 25, 72076 Tübingen, Germany  
Phone: +49 7071 29 89131  
Email: nicolas.ludolph@uni-tuebingen.de

## Dataset Description

In all \*.csv files:

|         |                  |
|---------|------------------|
| Subject | Subject ID       |
| Group   | Group of Subject |

Dataset1.csv:

|           |                                                                         |
|-----------|-------------------------------------------------------------------------|
| Age       | Age of Subject                                                          |
| Gender    | Gender of Subject                                                       |
| Tinit     | Initial avg. trial length (average over the first 5 minutes)            |
| Tend      | Final avg. trial length (average over the last 5 minutes)               |
| TT0init   | Initial avg. normalized trial length (average over the first 5 minutes) |
| TT0end    | Final avg. normalized trial length (average over the last 5 minutes)    |
| IRinit    | Initial avg. reward per second (average over the first 5 minutes)       |
| IRend     | Final avg. reward per second (average over the last 5 minutes)          |
| SUCCfirst | Time till the first successful trial (minutes)                          |
| ISIm10    | Avg. inter-success-interval over the first 10 successes                 |

Dataset2.csv:

|       |                                                                        |
|-------|------------------------------------------------------------------------|
| Pgw1  | avg. (g: 1.0 - 3.5) trial length difference within gravity steps       |
| Pga1  | avg. (g: 1.0 - 3.5) trial length difference across gravity steps       |
| ATgw1 | avg. (g: 1.0 - 3.5) action timing difference within gravity steps      |
| ATga1 | avg. (g: 1.0 - 3.5) action timing difference across gravity steps      |
| AVgw1 | avg. (g: 1.0 - 3.5) action variability difference within gravity steps |
| AVga1 | avg. (g: 1.0 - 3.5) action variability difference across gravity steps |
| Pgw2  | avg. (g: 1.3 - 3.5) trial length difference within gravity steps       |
| Pga2  | avg. (g: 1.3 - 3.5) trial length difference across gravity steps       |
| ATgw2 | avg. (g: 1.3 - 3.5) action timing difference within gravity steps      |
| ATga2 | avg. (g: 1.3 - 3.5) action timing difference across gravity steps      |
| AVgw2 | avg. (g: 1.3 - 3.5) action variability difference within gravity steps |
| AVga2 | avg. (g: 1.3 - 3.5) action variability difference across gravity steps |

Dataset3.csv:

|           |                        |
|-----------|------------------------|
| SuccessNr | Number of success      |
| ISI       | inter-success interval |

Dataset4.csv:

|      |                                                   |
|------|---------------------------------------------------|
| Time | time passed since the beginning of the experiment |
| G    | gravitational constant                            |
| T    | trial length                                      |
| TT0  | normalized trial length                           |
| R    | cumulated reward                                  |
| IR   | instantaneous reward                              |

Dataset5.csv:

|      |                                                   |
|------|---------------------------------------------------|
| Time | time passed since the beginning of the experiment |
| AT   | action timing                                     |
| AV   | action variability                                |

Dataset6.csv:

|      |                               |
|------|-------------------------------|
| Tbin | trial length bin              |
| ATnl | normalized action timing      |
| AVnl | normalized action variability |
